# Supplementary material for: Long-Term Outcomes of Contemporary Percutaneous Coronary Intervention with the Xience Drug-Eluting Stent: Results from a Multicentre Australian Registry
Source: MDPI journal article supplement (doi:10.3390/jcm12010280), 2022-12-29
Supplement: s1 [file s1]

## Supplementary Materials

**Table S1.** Baseline Clinical Characteristics by Acuity.

| Characteristics                      | Elective     |               |                 | Acute       |               |                 |
|--------------------------------------|--------------|---------------|-----------------|-------------|---------------|-----------------|
| <i>n</i> (%)                         | BMS<br>182   | Xience<br>560 | <i>p</i> -Value | BMS<br>318  | Xience<br>429 | <i>p</i> -Value |
| Age, years, mean (SD)                | 72.2 (9.7)   | 67.4 (9.4)    | <0.001          | 71.1 (11.9) | 66.2 (10.9)   | <0.001          |
| Male                                 | 144 (79.1%)  | 438 (78.2%)   | 0.80            | 238 (74.8%) | 324 (75.5%)   | 0.83            |
| Diabetes                             | 45 (24.9%)   | 147 (26.3%)   | 0.69            | 62 (19.6%)  | 109 (25.4%)   | 0.063           |
| Hypertension                         | 140 (76.9%)  | 419 (75.0%)   | 0.59            | 229 (72.5%) | 298 (70.1%)   | 0.48            |
| Hypercholesterolaemia                | 149 (84.7%)  | 479 (88.2%)   | 0.22            | 232 (76.3%) | 340 (82.1%)   | 0.056           |
| Family History of CAD                | 48 (28.7%)   | 203 (40.8%)   | 0.006           | 89 (29.7%)  | 169 (43.7%)   | <0.001          |
| Smoking (past or current)            | 102 (57.0%)  | 285 (52.2%)   | 0.27            | 173 (55.3%) | 254 (60.2%)   | 0.18            |
| BMI, kg/m <sup>2</sup> ±SD           | 29.2 (5.1)   | 29.1 (4.9)    | 0.90            | 28.8 (5.0)  | 28.8 (4.8)    | 0.96            |
| ‘LVEF, mean ± SD                     | 57.6 (10.5)  | 58.7 (9.8)    | 0.24            | 53.8 (11.4) | 57.0 (9.5)    | <0.001          |
| Previous MI                          | 31 (17.0%)   | 130 (23.3%)   | 0.075           | 52 (16.4%)  | 94 (22.0%)    | 0.054           |
| Previous Peripheral Vascular Disease | 23 (12.6%)   | 32 (5.7%)     | 0.002           | 27 (8.5%)   | 36 (8.4%)     | 0.98            |
| Previous PCI                         | 35 (19.3%)   | 211 (37.7%)   | <0.001          | 50 (15.8%)  | 127 (29.6%)   | <0.001          |
| Previous Cerebrovascular disease     | 20 (11.0%)   | 33 (5.9%)     | 0.022           | 31 (9.7%)   | 28 (6.6%)     | 0.11            |
| Previous CABG                        | 24 (13.3%)   | 55 (9.8%)     | 0.20            | 25 (7.9%)   | 43 (10.0%)    | 0.31            |
| Renal impairment                     | 14 (8.3%)    | 18 (3.6%)     | 0.014           | 24 (7.7%)   | 23 (5.7%)     | 0.28            |
| Clinical presentation                |              |               |                 |             |               | <0.001          |
| STEMI                                |              |               |                 | 100 (31.4%) | 43 (10.0%)    |                 |
| NSTEMI                               |              |               |                 | 145 (45.6%) | 215 (50.1%)   |                 |
| Unstable angina                      |              |               |                 | 73 (23.0%)  | 171 (39.9%)   |                 |
| Elective                             | 182 (100.0%) | 560 (100.0%)  |                 |             |               |                 |
| Cardiogenic Shock                    | 0 (0.0%)     | 1 (0.2%)      | 0.57            | 5 (1.6%)    | 1 (0.2%)      | 0.043           |

CAD-coronary artery disease; BMI-Body mass index; PCI- Percutaneous coronary intervention; CABG-Coronary artery bypass grafting; MI-Myocardial infarction; STEMI-ST-elevation myocardial infarction; NSTEMI-Non-ST-elevated myocardial infarction; SD-Standard deviation.

**Table S2.** Lesion & procedural characteristics by Acuity.

|                         |      | Elective                    |                             |          | Acute                       |                             |          |
|-------------------------|------|-----------------------------|-----------------------------|----------|-----------------------------|-----------------------------|----------|
|                         |      | BMS<br>182                  | Xience<br>560               | <i>p</i> | BMS<br>318                  | Xience<br>429               | <i>p</i> |
| Lesions/procedure, (SD) | mean | 1.2 (0.5) ( <i>n</i> = 182) | 1.4 (0.7) ( <i>n</i> = 560) | <0.001   | 1.2 (0.5) ( <i>n</i> = 318) | 1.4 (0.6) ( <i>n</i> = 429) | 0.002    |
| Access site             |      |                             |                             | 0.035    |                             |                             | <0.001   |
| Radial                  |      |                             |                             |          | 0 (0.0%)                    | 3 (0.7%)                    |          |
| Femoral                 |      | 48 (26.4%)                  | 195 (34.8%)                 |          | 69 (21.7%)                  | 142 (33.2%)                 |          |
| Brachial                |      | 134 (73.6%)                 | 365 (65.2%)                 |          | 249 (78.3%)                 | 283 (66.1%)                 |          |
| Lesion Type             |      |                             |                             | 0.089    |                             |                             | 0.001    |
| De novo                 |      | 176 (96.7%)                 | 531 (94.8%)                 |          | 312 (98.1%)                 | 396 (92.3%)                 |          |
| Restenosis              |      | 0 (0.0%)                    | 2 (0.4%)                    |          |                             |                             |          |

|                               |                              |                              |        |                              |                              |        |
|-------------------------------|------------------------------|------------------------------|--------|------------------------------|------------------------------|--------|
| In-stent restenosis           | 3 (1.6%)                     | 25 (4.5%)                    |        | 4 (1.3%)                     | 29 (6.8%)                    |        |
| Other                         | 2 (1.1%)                     | 2 (0.4%)                     |        | 2 (0.6%)                     | 4 (0.9%)                     |        |
| Unknown                       | 1 (0.5%)                     | 0 (0.0%)                     |        |                              |                              |        |
| ACC/AHA Morphology            |                              |                              | <0.001 |                              |                              | 0.048  |
| A                             | 32 (17.7%)                   | 45 (8.2%)                    |        | 38 (12.0%)                   | 41 (9.6%)                    |        |
| B1                            | 82 (45.3%)                   | 234 (42.5%)                  |        | 147 (46.4%)                  | 170 (39.7%)                  |        |
| B2 or C                       | 67 (37.0%)                   | 271 (49.3%)                  |        | 132 (41.6%)                  | 217 (50.7%)                  |        |
| Target vessel                 |                              |                              | 0.010  |                              |                              | 0.001  |
| RCA                           | 70 (38.7%)                   | 162 (29.3%)                  |        | 132 (41.6%)                  | 129 (30.1%)                  |        |
| LMCA                          | 3 (1.7%)                     | 7 (1.3%)                     |        | 2 (0.6%)                     | 2 (0.5%)                     |        |
| LAD                           | 63 (34.8%)                   | 270 (48.9%)                  |        | 98 (30.9%)                   | 193 (45.1%)                  |        |
| LCx                           | 35 (19.3%)                   | 98 (17.8%)                   |        | 70 (22.1%)                   | 91 (21.3%)                   |        |
| Bypass Graft                  | 10 (5.5%)                    | 15 (2.7%)                    |        | 15 (4.7%)                    | 13 (3.0%)                    |        |
| Chronic total occlusion       | 1 (0.6%)                     | 15 (2.7%)                    | 0.083  | 4 (1.3%)                     | 7 (1.6%)                     | 0.67   |
| Multi-vessel disease          | 59 (32.4%)                   | 195 (34.8%)                  | 0.60   | 111 (34.9%)                  | 154 (35.9%)                  | 0.92   |
| Bifurcation lesion            | 12 (6.7%)                    | 71 (12.9%)                   | 0.023  | 12 (3.8%)                    | 42 (9.8%)                    | 0.002  |
| Lesion success                | 181 (100.0%)                 | 548 (99.5%)                  | 0.32   | 315 (99.4%)                  | 426 (99.5%)                  | 0.76   |
| Stents / procedure, mean (SD) | 1.3 (0.7) ( <i>n</i> = 182)  | 1.5 (0.8) ( <i>n</i> = 560)  | 0.029  | 1.3 (0.7) ( <i>n</i> = 318)  | 1.5 (0.8) ( <i>n</i> = 429)  | 0.005  |
| Stent length, mean (SD)       | 16.4 (4.4) ( <i>n</i> = 182) | 18.9 (6.1) ( <i>n</i> = 559) | <0.001 | 17.4 (4.9) ( <i>n</i> = 317) | 18.4 (6.1) ( <i>n</i> = 429) | 0.020  |
| Stent length >20 mm           | 24 (13.2%)                   | 178 (31.8%)                  | <0.001 | 61 (19.2%)                   | 121 (28.2%)                  | 0.005  |
| Stent diameter, mean (SD)     | 3.4 (0.7) ( <i>n</i> = 182)  | 2.9 (0.4) ( <i>n</i> = 559)  | <0.001 | 3.3 (0.6) ( <i>n</i> = 317)  | 2.9 (0.5) ( <i>n</i> = 429)  | <0.001 |
| Vessel ≤2.5 mm                | 22 (12.1%)                   | 135 (24.1%)                  | <0.001 | 42 (13.2%)                   | 112 (26.1%)                  | <0.001 |
| IIb/IIIa use during procedure | 9 (4.9%)                     | 18 (3.2%)                    | 0.28   | 38 (11.9%)                   | 37 (8.6%)                    | 0.13   |

RCA-Right coronary artery; LMCA-Left main coronary artery; LAD-Left anterior descending artery; LCX-Left circumflex artery; BMS-Bare metal stent; SD-Standard deviation.
